# Supplementary material for: Leptin Receptor Metabolism Disorder in Primary Chondrocytes from Adolescent Idiopathic Scoliosis Girls
Source: PubMed Central journal article supplement (PMC4964532; doi:10.3390/ijms17071160), 2016-07-20
Supplement: ijms-17-01160-s001.pdf [file ijms-17-01160-s001.pdf]

## Supplementary Materials: Leptin Receptor Metabolism Disorder in Primary Chondrocytes from Adolescent Idiopathic Scoliosis Girls

Yun-Jia Wang, Hong-Gui Yu, Zhen-Hai Zhou, Qiang Guo, Long-Jie Wang and Hong-Qi Zhang

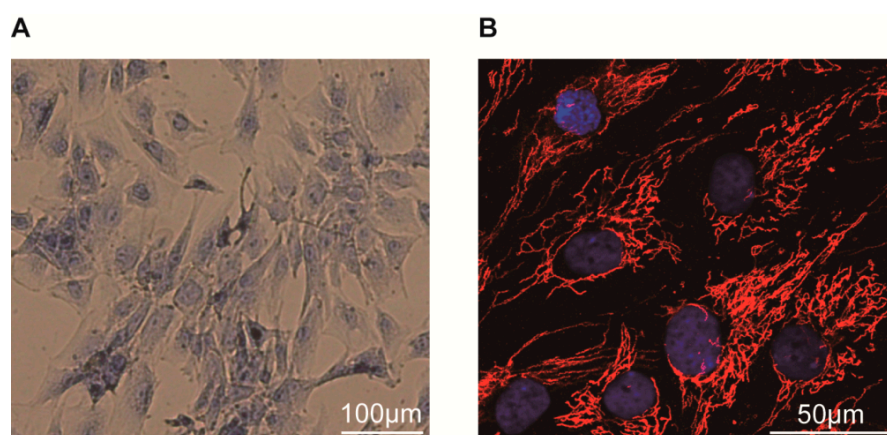

**Figure S1.** Identification of primary chondrocytes isolated from the human facet joint. (A) Cell morphology and biological characteristics were determined by toluidine blue staining. Scale bar = 100  $\mu\text{m}$ ; (B) Collagen II expression was shown by immunofluorescence staining. Scale bar = 50  $\mu\text{m}$ .

**Table S1.** Anthropometrics and total serum leptin levels in the AIS patients.

|                                         | AIS               |                       |                           |
|-----------------------------------------|-------------------|-----------------------|---------------------------|
|                                         | AIS ( $n = 31$ )  | Suigical ( $n = 15$ ) | Non-Surgical ( $n = 16$ ) |
|                                         | Mean $\pm$ SD     | Mean $\pm$ SD         | Mean $\pm$ SD             |
| Age                                     | 12.81 $\pm$ 1.82  | 13.20 $\pm$ 1.47      | 12.44 $\pm$ 2.06          |
| Weight (kg)                             | 40.90 $\pm$ 4.56  | 40.93 $\pm$ 6.55      | 41.81 $\pm$ 3.99          |
| Height (cm)                             | 152.06 $\pm$ 7.11 | 151.07 $\pm$ 6.37     | 153.00 $\pm$ 7.83         |
| BMI ( $\text{kg}/\text{m}^2$ )          | 17.66 $\pm$ 1.15  | 17.91 $\pm$ 2.46      | 17.84 $\pm$ 0.74          |
| Cobb angle ( $^\circ$ )                 | 39.90 $\pm$ 14.95 | 53.47 $\pm$ 7.68      | 27.19 $\pm$ 5.94 *        |
| Leptin levels ( $\text{ng}/\text{mL}$ ) | 7.62 $\pm$ 2.80   | 7.94 $\pm$ 3.87       | 7.69 $\pm$ 3.38           |

\*:  $p < 0.05$  vs. the suigical group (Independent-samples  $t$  test); BMIs were calculated by dividing the body weight by the squared arm span ( $\text{m}^2$ ); Abbreviations: AIS, adolescent idiopathic scoliosis; BMI, body mass index.

**Table S2.** Information of the control patients (for primary chondrocytes isolated).

| Patient No. | Dignosis            | Age | Weight (kg) | Height (cm) | BMI ( $\text{kg}/\text{m}^2$ ) | Leptin Level ( $\text{ng}/\text{mL}$ ) |
|-------------|---------------------|-----|-------------|-------------|--------------------------------|----------------------------------------|
| 1           | Multiple trauma     | 13  | 40          | 147         | 18.51                          | 7.40                                   |
| 2           | L1 fracture         | 14  | 45          | 150         | 20                             | 10.00                                  |
| 3           | Multiple trauma     | 13  | 38          | 143         | 18.58                          | 6.37                                   |
| 4           | Multiple trauma     | 15  | 47          | 155         | 19.56                          | 8.13                                   |
| 5           | LDH                 | 14  | 44          | 157         | 17.85                          | 8.53                                   |
| 6           | LDH                 | 15  | 52          | 160         | 20.31                          | 9.35                                   |
| 7           | LDH                 | 14  | 49          | 150         | 21.78                          | 6.78                                   |
| 8           | spinal tuberculosis | 13  | 38          | 148         | 17.35                          | 8.13                                   |

BMIs were calculated by dividing the body weight by the squared arm span ( $\text{m}^2$ ); Abbreviations: LDH, lumbar disc herniation; BMI, body mass index.
